# Supplementary material for: Genome-wide association mapping for resistance to leaf, stem, and yellow rusts of common wheat under field conditions of South Kazakhstan
Source: PeerJ. 2020 Aug 31;8:e9820. doi: 10.7717/peerj.9820 (PMC7469934; doi:10.7717/peerj.9820)
Supplement: Supplemental Information 3 [file peerj-08-9820-s003.xlsx]

## Sheet: Table S1
Table S1 - List of common wheat cultivars and breeding lines used in the current study
COMMON WHEAT CULTIVARS OFFICIALLY APPROVED FOR THE USE ON THE TERRITORY OF KAZAKHSTAN
#	ID	Cultivar name	Country of origin
1	WKZ_01	Avangard	Kazakhstan
2	WKZ_02	Akmola 2	Kazakhstan
3	WKZ_03	Aktyube 39	Kazakhstan
4	WKZ_05	Almaken	Kazakhstan
5	WKZ_06	Altay	Kazakhstan
6	WKZ_07	Altayskaya 110	Russia
7	WKZ_08	Altayskaya 325	Russia
8	WKZ_09	Altayskaya 98	Kazakhstan
9	WKZ_10	Altayskaya stepnaya	Russia
10	WKZ_11	Albidum 188	Russia
11	WKZ_12	Arai	Kazakhstan
12	WKZ_13	Astana	Kazakhstan
13	WKZ_14	Astana 2	Kazakhstan
14	WKZ_15	Baiterek	Kazakhstan
15	WKZ_16	Vera	Russia
16	WKZ_17	Volgouralskaya	Russia
17	WKZ_18	Darina	Kazakhstan
18	WKZ_19	Dauyl	Kazakhstan
19	WKZ_20	Ertys 7	Kazakhstan
20	WKZ_21	Ertys-97	Kazakhstan
21	WKZ_22	Zhenis	Kazakhstan
22	WKZ_23	Zaulbinka	Kazakhstan
23	WKZ_24	Kazakhstankaya 15	Kazakhstan
24	WKZ_25	Kazakhstankaya 25	Kazakhstan
25	WKZ_26	Kazakhstankaya 4	Kazakhstan
26	WKZ_27	Kazakhstankaya rannespelaya	Kazakhstan
27	WKZ_28	Karabalykskaya 2	Kazakhstan
28	WKZ_29	Karabalykskaya 25	Kazakhstan
29	WKZ_30	Karabalykskaya 3	Kazakhstan
30	WKZ_31	Karabalykskaya 9	Kazakhstan
31	WKZ_32	Karabalykskaya 90	Kazakhstan
32	WKZ_33	Karabalykskaya 92	Kazakhstan
33	WKZ_34	Karagandinskaya 22	Kazakhstan
34	WKZ_35	Karagandinskaya 25	Kazakhstan
35	WKZ_36	Karagandinskaya 29	Kazakhstan
36	WKZ_38	Kazragandinskaya 70	Kazakhstan
37	WKZ_39	Kenzhegali	Kazakhstan
38	WKZ_40	Oral	Kazakhstan
39	WKZ_41	Kutulukskaya	Russia
40	WKZ_42	Lyubava	Kazakhstan
41	WKZ_43	Lutescens 32	Kazakhstan
42	WKZ_44	Lutescens 5	Kazakhstan
43	WKZ_45	Lutescens 521	Russia
44	WKZ_46	Lutescens 90	Kazakhstan
45	WKZ_47	Lyazzat	Kazakhstan
46	WKZ_48	Miras	Kazakhstan
47	WKZ_49	Nadezhda	Kazakhstan
48	WKZ_51	Niva 2	Russia
49	WKZ_53	Omskaya 19	Russia
50	WKZ_54	Omskaya 20	Russia
51	WKZ_55	Omskaya 24	Russia
52	WKZ_56	Omskaya 28	Russia
53	WKZ_57	Omskaya 29	Russia
54	WKZ_58	Omskaya 30-1	Russia
55	WKZ_59	Omskaya 35	Russia
56	WKZ_60	Omskaya 36	Russia
57	WKZ_62	Pavlodarskaya 93	Kazakhstan
58	WKZ_63	Karagandinskaya 30	Kazakhstan
59	WKZ_64	Pamyati Azieva	Russia
60	WKZ_65	Omskaya 30-2	Russia
61	WKZ_66	Rosinka 3	Russia
62	WKZ_67	Samad	Kazakhstan
63	WKZ_68	Samgau	Kazakhstan
64	WKZ_69	Saratovskaya29	Russia
65	WKZ_70	Saratovskaya42	Russia
66	WKZ_71	Saratovskaya55	Russia
67	WKZ_72	Saratovskaya56	Russia
68	WKZ_73	Saratovskaya58	Russia
69	WKZ_74	Saratovskaya60	Russia
70	WKZ_75	Saratovskaya66	Russia
71	WKZ_76	Saratovskaya Yugo-Vostochanya	Russia
72	WKZ_77	Severyanka	Kazakhstan
73	WKZ_78	Seke	Kazakhstan
74	WKZ_79	Nargiz	Kazakhstan
75	WKZ_80	Stepnaya 1	Kazakhstan
76	WKZ_81	Ulbinka 25	Kazakhstan
77	WKZ_82	Tselina 50	Kazakhstan
78	WKZ_83	Tselinnaya 24	Kazakhstan
79	WKZ_84	Tselinnaya 26	Kazakhstan
80	WKZ_85	Tselinnaya 3С	Kazakhstan
81	WKZ_86	Tselinnaya Юб.	Kazakhstan
82	WKZ_87	Shortandinskaya 2007	Kazakhstan
83	WKZ_88	Shortandinskaya 95 uluchshennaya	Kazakhstan
84	WKZ_89	Eritrospermum 35	Kazakhstan
85	WKZ_90	Yugo-Vostochnaya 2	Russia
86	WKZ_91	Yugo-Vostochnaya 3	Russia
87	WKZ_92	Kazakhstan 20	Kazakhstan
88	WKZ_93	Altayskaya 50	Russia
89	WKZ_94	Altayskaya 100	Russia
90	WKZ_95	Korneevka	Kazakhstan
91	WKZ_96	Chernyava 13	Russia
COMMON WHEAT CULTIVARS FROM EUROPE
#	ID	Cultivar name	Source
1	EU_01	Aintree	John Innes Centre (UK)
2	EU_02	Anduril	John Innes Centre (UK)
3	EU_03	Aronde	John Innes Centre (UK)
4	EU_04	Ashby	John Innes Centre (UK)
5	EU_05	Axona	John Innes Centre (UK)
6	EU_06	Belvoir	John Innes Centre (UK)
7	EU_07	B. Teutonen	John Innes Centre (UK)
8	EU_08	Cadenza	John Innes Centre (UK)
9	EU_09	Garnet	John Innes Centre (UK)
10	EU_10	Granary	John Innes Centre (UK)
11	EU_11	Haydock	John Innes Centre (UK)
12	EU_12	Heines Kolben	John Innes Centre (UK)
13	EU_13	Heines Pecko	John Innes Centre (UK)
14	EU_14	Highbury	John Innes Centre (UK)
15	EU_15	Jerico	John Innes Centre (UK)
16	EU_16	Jury 1	John Innes Centre (UK)
17	EU_17	Koga 1	John Innes Centre (UK)
18	EU_18	Koga 2	John Innes Centre (UK)
19	EU_19	Maris Butler	John Innes Centre (UK)
20	EU_20	Maris Dove	John Innes Centre (UK)
21	EU_21	Maris Ensign	John Innes Centre (UK)
22	EU_22	Maris Halberd	John Innes Centre (UK)
23	EU_23	Maris Nimrod	John Innes Centre (UK)
24	EU_24	Maris Pinion	John Innes Centre (UK)
25	EU_25	Newmarket	John Innes Centre (UK)
26	EU_26	Paragon	John Innes Centre (UK)
27	EU_27	Peragis	John Innes Centre (UK)
28	EU_28	Raffles	John Innes Centre (UK)
29	EU_29	Red Fife	John Innes Centre (UK)
30	EU_30	Selkirk	John Innes Centre (UK)
31	EU_31	Sicco	John Innes Centre (UK)
32	EU_32	Solitaire	John Innes Centre (UK)
33	EU_33	Thatcher	John Innes Centre (UK)
34	EU_34	Tonic	John Innes Centre (UK)
35	EU_35	Tybalt	John Innes Centre (UK)
36	EU_36	Wembley	John Innes Centre (UK)
37	EU_37	White Fife	John Innes Centre (UK)
38	EU_38	Zircon	John Innes Centre (UK)
CULTIVARS AND BREEDING LINES OF COMMON WHEAT OBTAINED FROM RESEARCH INSTITUTE OF BIOLOGICAL SAFETY PROBLEMS (RIBSP, KAZAKHSTAN)
#	ID	Cultivar/line name	Country of origin
1	WO_01	6569 х T.millitinae	Kazakhstan
2	WO_02	6625 х T.timofeevi	Kazakhstan
3	WO_03	6628 х T.timofeevi	Kazakhstan
4	WO_04	6631 х T.millitinae	Kazakhstan
5	WO_05	Kazakhstankaya 10 x T.timofeevi	Kazakhstan
6	WO_06	Kazakhstankaya 25 x T.timofeevi	Kazakhstan
7	WO_07	6525 х T.timofeevi	Kazakhstan
8	WO_08	6583 х T.timofeevi	Kazakhstan
9	WO_09	Avgustina	Kazakhstan
10	WO_10	Aina	Kazakhstan
11	WO_11	GWK 2161	Kazakhstan
12	WO_12	Ilyinskaya х T.timofeevi	Kazakhstan
13	WO_13	Intensivnaya	Kazakhstan
14	WO_14	IR-38	Kazakhstan
15	WO_15	IR-53	Kazakhstan
16	WO_16	Kazakhstankaya 10 x T.dicoccum	Kazakhstan
17	WO_17	Kazakhstankaya 10 x T.kiharae	Kazakhstan
18	WO_18	Kazakhstankaya 17 x T.kiharae	Kazakhstan
19	WO_19	Lutescens 1003	Russia
20	WO_20	Lutescens 1193	Russia
21	WO_21	Lutescens 1300	Russia
22	WO_22	Lutescens 151-03-85	Russia
23	WO_23	Lutescens 186/04-61	Russia
24	WO_24	Lutescens 2/03-09-3	Kazakhstan
25	WO_25	Lutescens 230/00	Kazakhstan
26	WO_26	Lutescens 242-97-2-26	Russia
27	WO_27	Lutescens 248/01	Kazakhstan
28	WO_28	Lutescens 27-12	Russia
29	WO_29	Lutescens 310-00-10	Russia
30	WO_30	Lutescens 34/08-19	Russia
31	WO_31	Lutescens 363-96-4	Russia
32	WO_32	Lutescens 449	Russia
33	WO_33	Lutescens 588-2-05	Kazakhstan
34	WO_34	Lutescens 648	Russia
35	WO_35	Lutescens 715-04	Kazakhstan
36	WO_36	Lutescens 90-12	Russia
37	WO_37	Lutescens 96-12	Russia
38	WO_38	Lutescens KS 14/09-2	Russia
39	WO_39	Lutescens1082	Kazakhstan
40	WO_40	Niva Priirtyshya	Kazakhstan
41	WO_41	Novosibirskaya 18	Russia
42	WO_42	Obskaya 2	Russia
43	WO_43	OmGAU-100	Russia
44	WO_44	Oskemen	Kazakhstan
45	WO_45	Pavlodarskaya Yubileynaya	Kazakhstan
46	WO_46	Rodnik	Russia
47	WO_47	Saratovskaya 75	Russia
48	WO_48	Sibirskaya 21	Russia
49	WO_49	Silach	Russia
50	WO_50	Stepnaya 53	Kazakhstan
51	WO_51	Stolypinskaya 2	Russia
52	WO_52	Tercia	Kazakhstan/Russia
53	WO_53	Timofeev-173	Russia
54	WO_54	Tornado 22	Kazakhstan
55	WO_55	Tyumenochka	Russia
56	WO_56	Tyumenskaya Yubileynaya	Russia
57	WO_57	Fiton 204	Kazakhstan
58	WO_58	Fiton 41	Kazakhstan
59	WO_59	Chelyaba Yubileynaya	Russia
60	WO_60	Shortandinskaya 2014	Kazakhstan
61	WO_61	E -683	Kazakhstan
62	WO_62	E -736	Kazakhstan
63	WO_63	E -737	Kazakhstan
64	WO_64	E -746	Kazakhstan
65	WO_65	E -756	Kazakhstan
66	WO_66	E -757	Kazakhstan
67	WO_67	E -758	Kazakhstan
68	WO_68	E -760	Kazakhstan
69	WO_69	E -761	Kazakhstan
70	WO_70	E -795	Kazakhstan
71	WO_71	E -798	Kazakhstan
72	WO_72	E -805	Kazakhstan
73	WO_73	E -806	Kazakhstan
74	WO_74	E -807	Kazakhstan
75	WO_75	E -815	Kazakhstan
76	WO_76	E -819	Kazakhstan
77	WO_77	E -607	Kazakhstan
78	WO_78	Pavon 76	Mexico
79	WO_79	Buckbuck	Mexico
80	WO_80	Eagle	Mexico
81	WO_81	Gatcher	USA
82	WO_82	Seri 82	Australia
83	WO_83	Norka	Australia
84	WO_84	Agent	USA
85	WO_85	Agatha	Germany
86	WO_86	Marquis	Canada
