# Supplementary material for: Genome-wide association mapping for resistance to leaf, stem, and yellow rusts of common wheat under field conditions of South Kazakhstan
Source: PeerJ. 2020 Aug 31;8:e9820. doi: 10.7717/peerj.9820 (PMC7469934; doi:10.7717/peerj.9820)
Supplement: Supplemental Information 4 — Positions of SNPs are given according to 20K Illumina iSelect SNP assay (cM) and multiplied on 10 in order to fit TASSEL requerments. Red line denotes selected threshold at P < 1E-3 [file peerj-08-9820-s004.xlsx]

## Sheet: Manhattan
Table S2. Manhattan and QQ plots with MTAs for LR, SR, and YR identified in the currient study. Positions of SNPs are given according to 20K Illumina iSelect SNP assay (cM) and multiplied on 10 in order to fit TASSEL requerments. Red line denotes selected threshold at P<1E-3
Trait	Year	Manhattan plot	QQ plot
Leaf rust (LR)	2018
Leaf rust (LR)	2019
Stem rust (SR)	2018
Stem rust (SR)	2019
Yellow rusr (YR)	2018
Yellow rusr (YR)	2019
